# Supplementary material for: Dynamic Succession of Natural Microbes during the Ecolly Grape Growth under Extremely Simplified Eco-Cultivation
Source: MDPI journal article supplement (doi:10.3390/foods13101580), 2024-05-18
Supplement: s1 [file s1]

**Figure S1:** Sampling stages and fruit condition during the growth and development of Ecolly grape berries.

**Figure S2:** Rarefaction curves for fungi (A) and bacteria (B) for each sample during the grape growing stage. The horizontal coordinate indicates the number of sequences sampled and the vertical coordinate indicates the number of OTUs for the corresponding sequence.

**Figure S3:** Analytical box plots of the evenness of the microbial community during growing stage. The smaller the value, the higher the degree of the evenness.

**Figure S4:** Procrustes analysis of microbial communities during growing stage. Dots in the figure indicate the samples, and dots connected by lines indicate the 16S and ITS sequencing results corresponding to one sample.

**Figure S5:** Linear discriminant analysis (LDA) and effect size (LEfSe) to determine bacterial markers for each growth stage. (A): Evolutionary branching maps characterize the biological taxonomic hierarchy of significantly different bacterial taxa; (B): Linear discriminant analysis (LDA) demonstrates the effect size of differential bacterial genera.

**Figure S6:** Microbial community assembly processes based on  $\beta$ NTI- and RCbray during grape growth. (A) Fungi; (B): Bacteria.

**Figure S7:** Co-occurrence network of fungal communities at each growing stage. Node size indicates its degree of connectivity; The edge represents the co-occurrence association between microbial genera, with red color showing a positive correlation and blue color indicating a negative correlation. A: Fruit-set; B: Veraison-early; C: Veraison-end; D: Mid-maturity; E: Harvest

**Figure S8:** Co-occurrence network of bacterial communities at each growing stage. The edge represents the co-occurrence association between microbial genera, with red color showing a positive correlation and blue color indicating a negative correlation. A: Fruit-set; B: Veraison-early; C: Veraison-end; D: Mid-maturity; E: Harvest

**Figure S9:** Mantel test analysis of microbial communities and weather parameters during grape growth. (A): Fungi; (B): Bacteria

**Figure S10:** Variance partition analysis of fungal and bacterial communities during grape growth. (A): Fungi; (B): Bacteria. EnV1, mean temperature (°C); EnV2, mean high temperature (°C); EnV3, mean low temperature (°C); EnV4, precipitation (mm); EnV5, relative moisture (%); EnV6, evaporation (mm); EnV7, solar radiation (J/m<sup>2</sup>) and EnV8, sunlight hours (h).

Figure S1

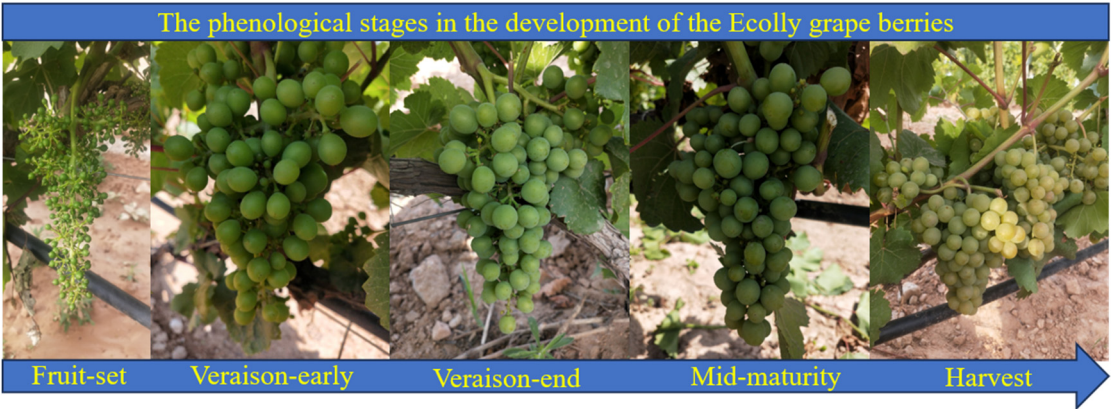

Figure S2

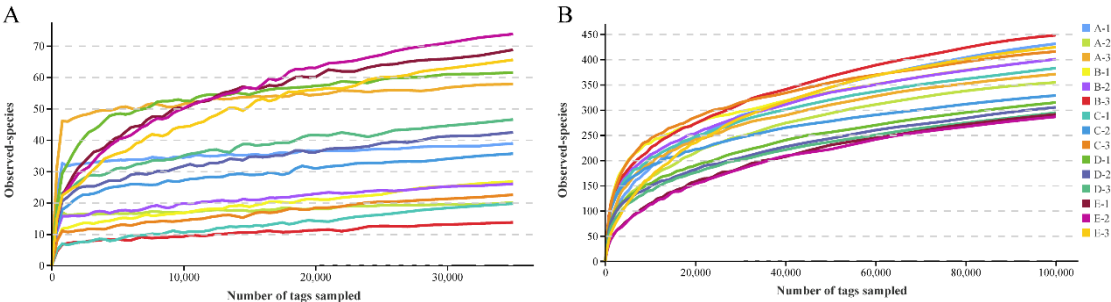

Figure S3

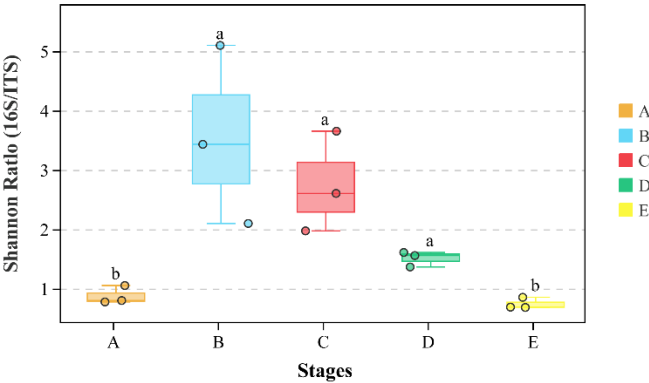

Figure S4

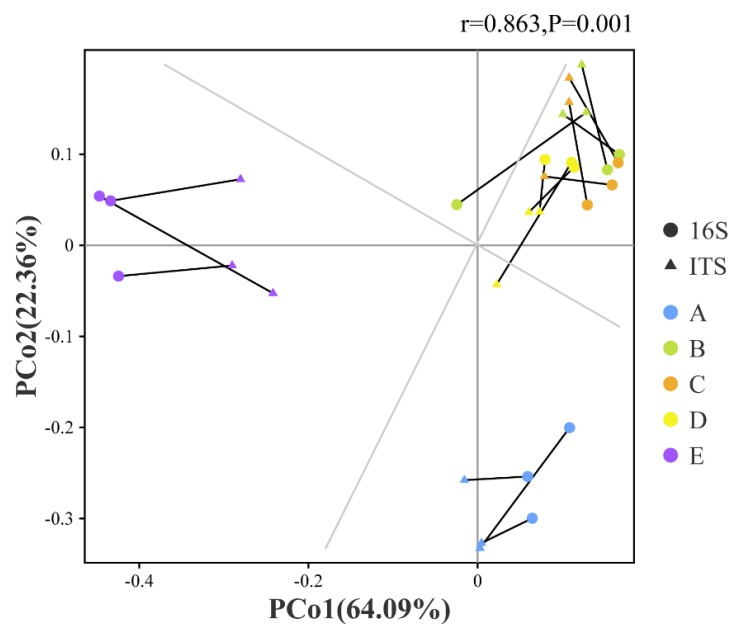

Figure S5

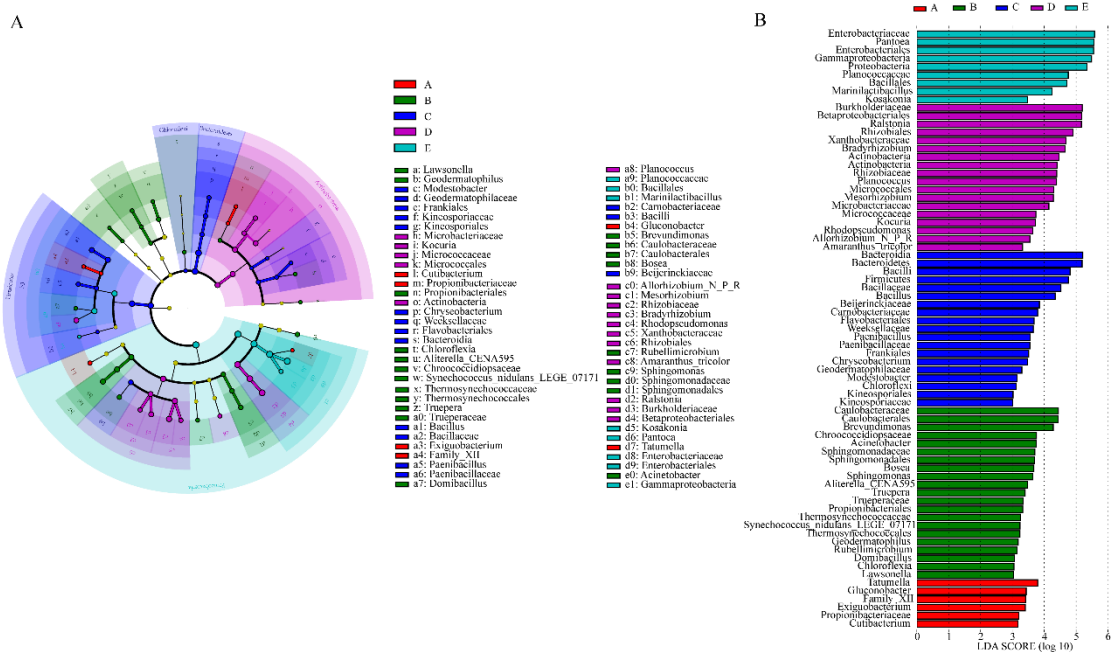

Figure S6

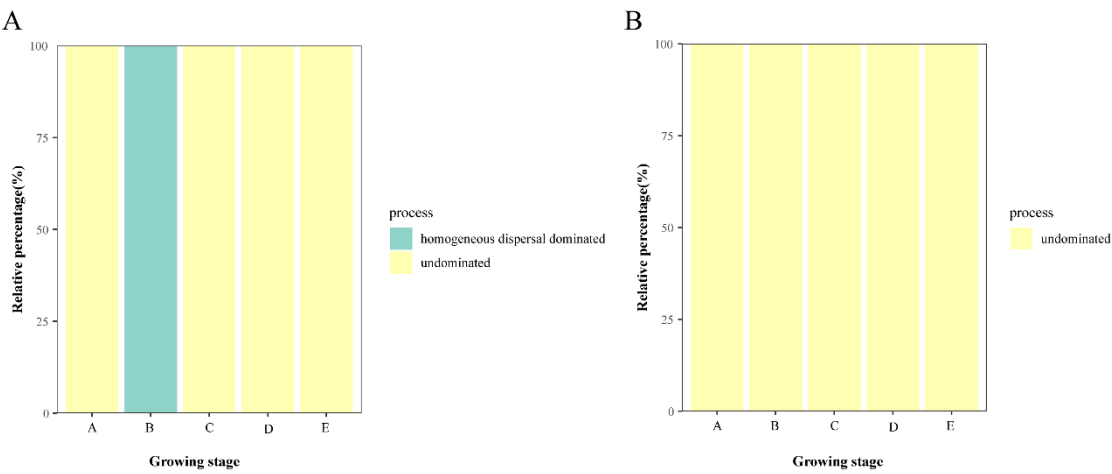

Figure S7

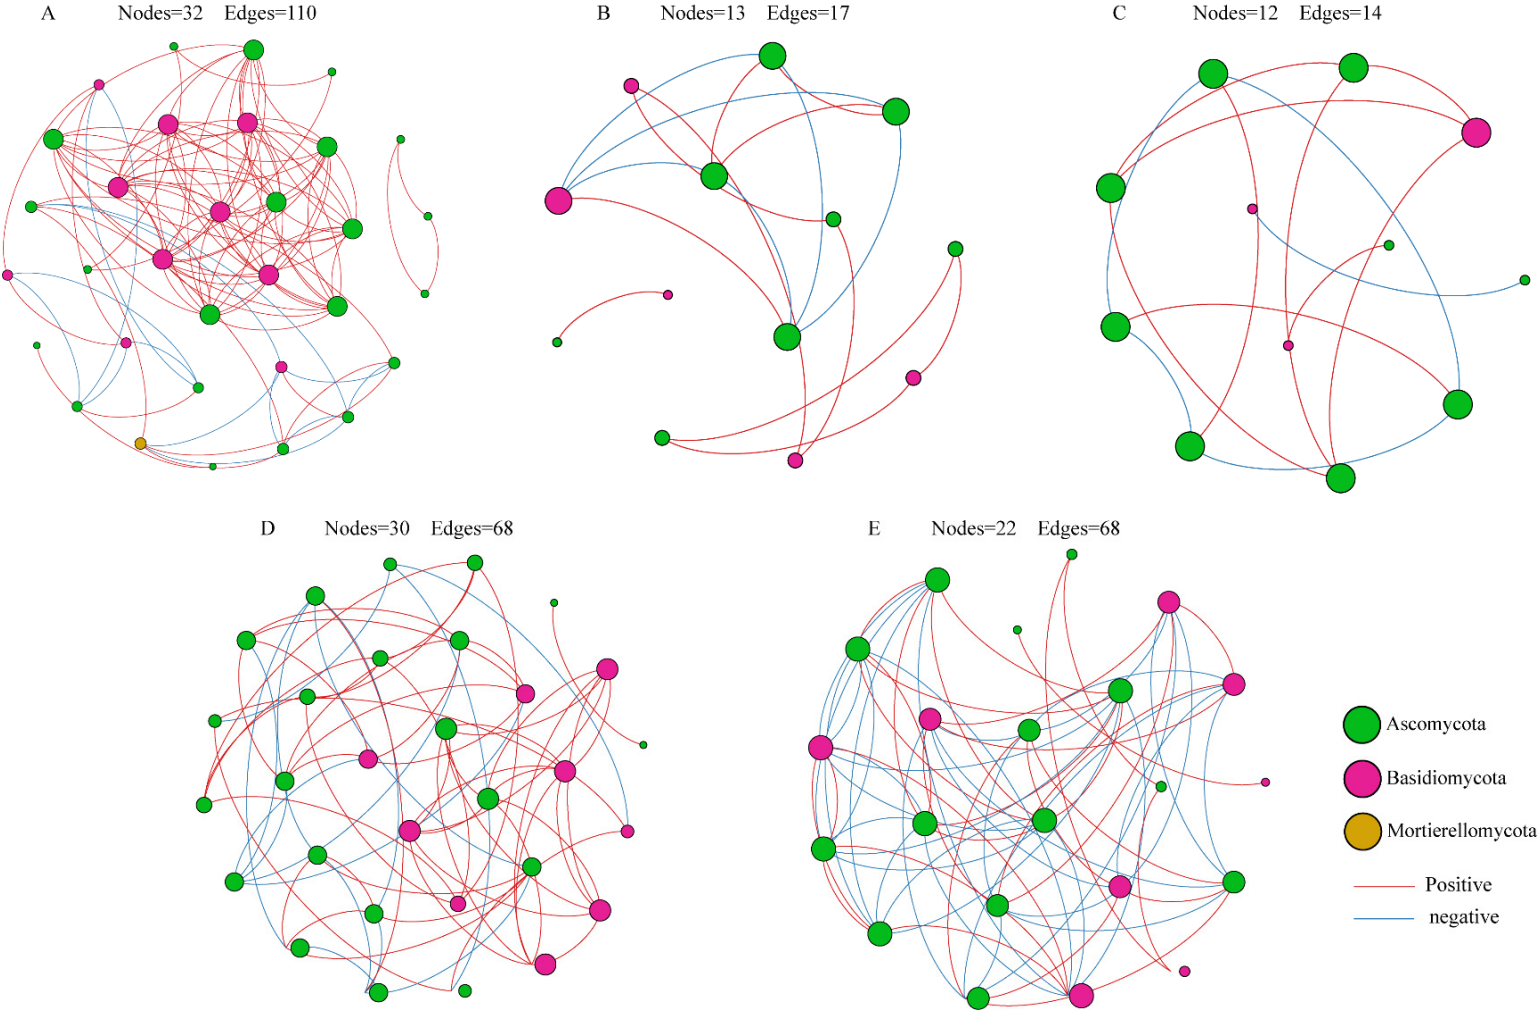

Figure S8

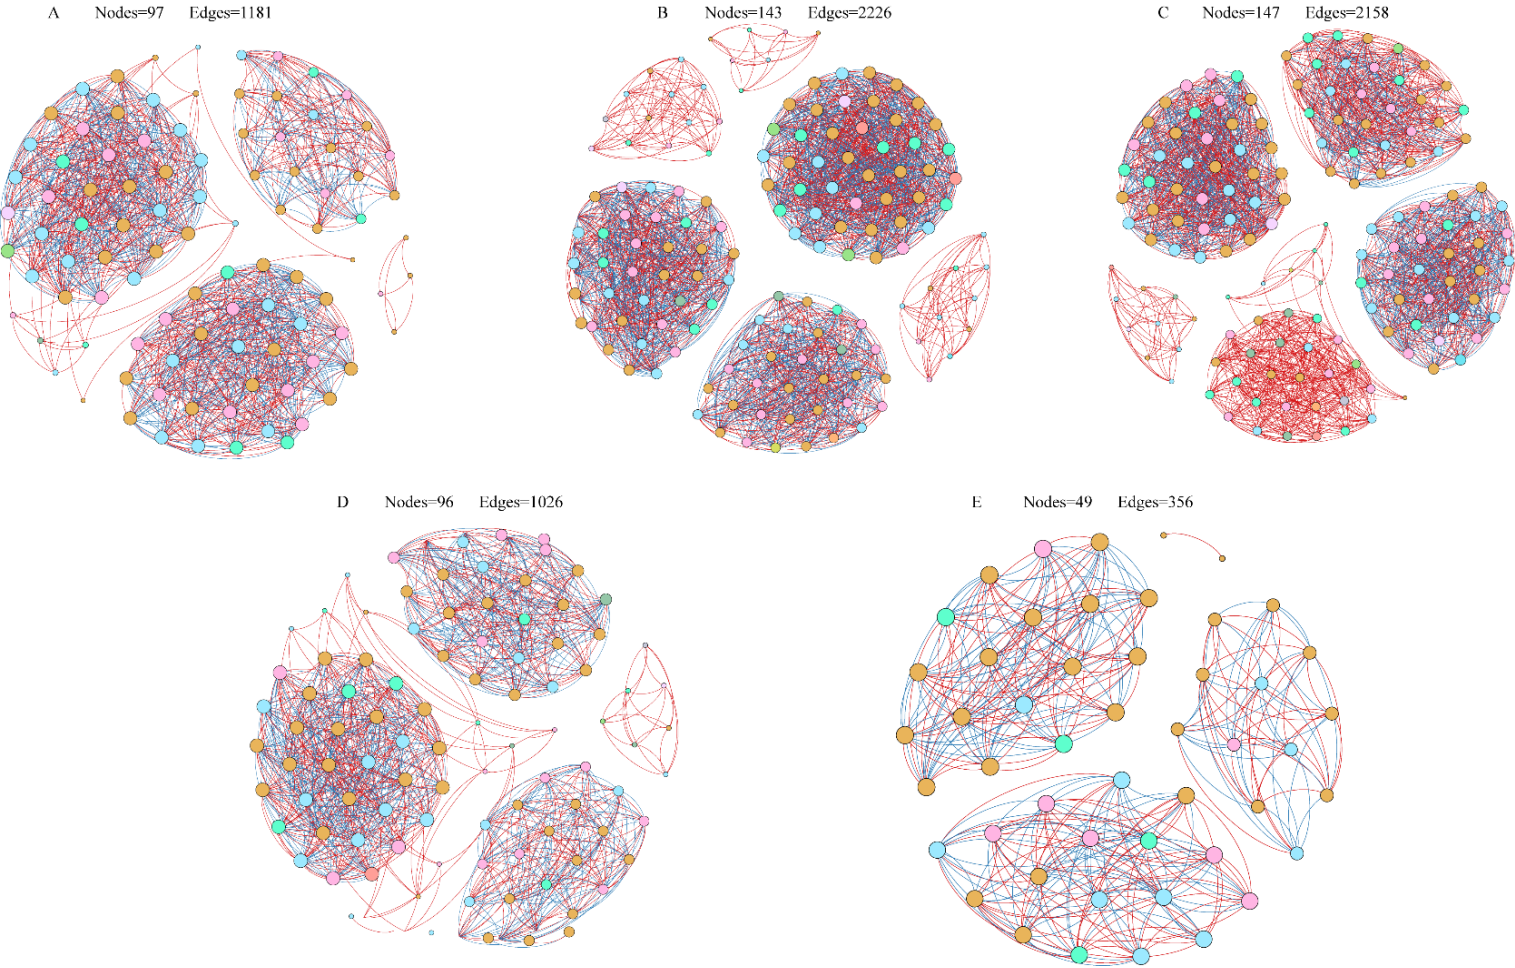

Figure S9

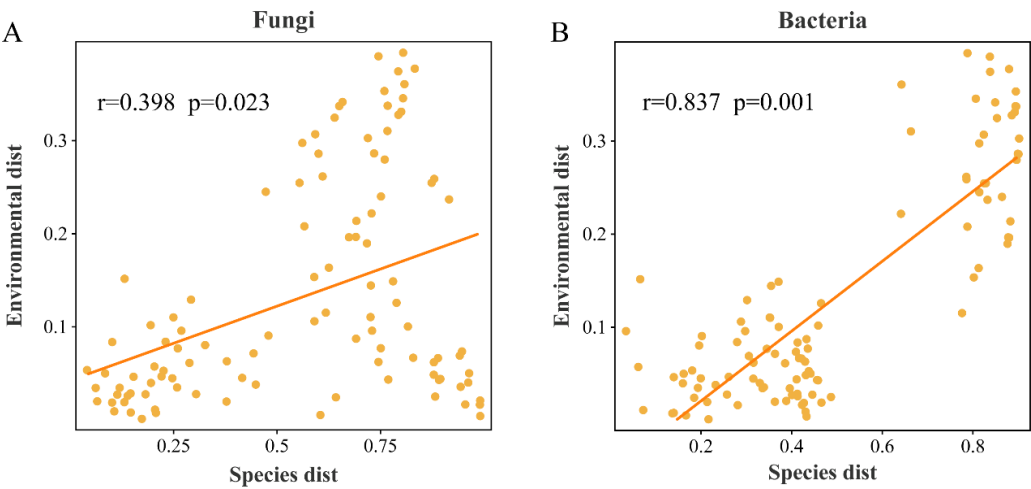

Figure S10

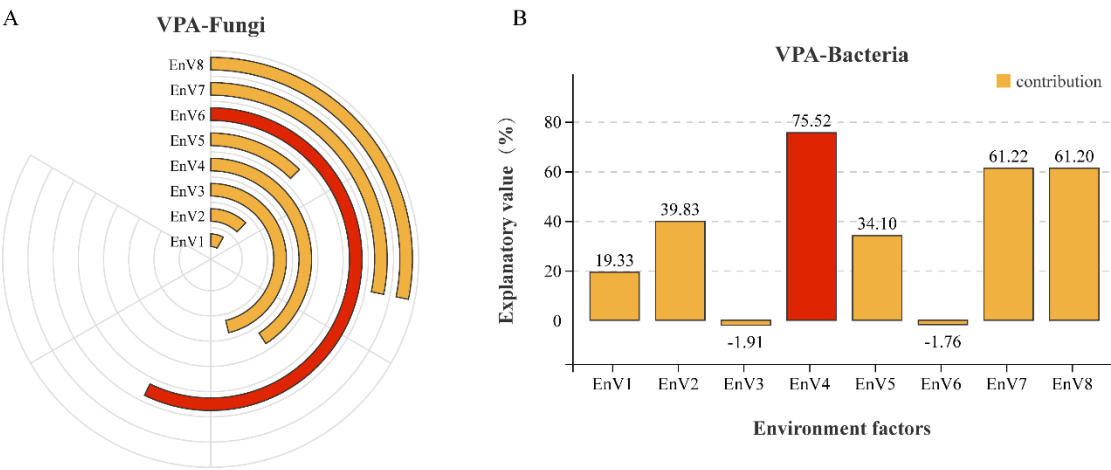

**Table S1:** Evaluation of the diversity indices of the epidermal microbiome during the grape growth and development process

| Microbes | Index            | Fruit-set     | Veraison-early | Veraison-end  | Mid-maturity  | Harvest       | <i>F value</i> | <i>P value</i>   |
|----------|------------------|---------------|----------------|---------------|---------------|---------------|----------------|------------------|
| Fungi    | Chao1            | 52.67±10.61b  | 45.58±1.12b    | 45.29±5.15b   | 80.58±12.96ab | 97.79±5.56a   | 8.24           | <b>0.003</b>     |
|          | ACE              | 59.38±10.64b  | 54.05±9.37b    | 54.18±6.47b   | 78.98±8.22ab  | 98.14±4.92a   | 5.66           | <b>0.012</b>     |
|          | Shannon          | 3.62±0.28a    | 1.26±0.26d     | 1.51±0.25cd   | 2.44±0.16bc   | 2.55±0.02b    | 18.55          | <b>&lt;0.001</b> |
|          | Simpson          | 0.86±0.02a    | 0.38±0.06b     | 0.46±0.07b    | 0.69±0.04a    | 0.76±0.01a    | 21.71          | <b>&lt;0.001</b> |
|          | Observed species | 45.00±9.24b   | 29.67±3.38b    | 32.67±5.24b   | 54.67±8.17b   | 87.00±4.62a   | 12.54          | <b>0.001</b>     |
| Bacteria | Chao1            | 456.04±35.04a | 545.94±28.29a  | 448.88±31.78a | 403.85±6.39a  | 406.19±44.98a | 3.25           | 0.059            |
|          | ACE              | 468.99±35.59a | 554.94±26.50a  | 472.48±33.92a | 416.07±2.48a  | 417.66±40.82a | 3.34           | 0.056            |
|          | Shannon          | 3.13±0.07b    | 4.01±0.23a     | 3.89±0.24ab   | 3.66±0.06ab   | 1.90±0.16c    | 25.97          | <b>&lt;0.001</b> |
|          | Simpson          | 0.76±0.02a    | 0.84±0.03a     | 0.82±0.04a    | 0.83±0.00a    | 0.46±0.04b    | 34.07          | <b>&lt;0.001</b> |
|          | Observed species | 393.33±23.95a | 430.67±17.68a  | 385.67±28.50a | 314.33±6.17a  | 341.33±44.86a | 2.78           | 0.086            |

Note: Data are represented as mean ± standard deviation (n = 3) and different lowercase letters after each row of data indicate significant difference. (Tukey's HSD,  $p < 0.05$ ).

**Table S2:** Overview of topological complementary parameters of fungal networks during grape process

| Growing stage  | Network parameters              | Value      |
|----------------|---------------------------------|------------|
| Fruit-set      | Number of nodes                 | 32         |
|                | Number of edges                 | 110        |
|                | Number of positive correlations | 96(87.27%) |
|                | Number of negative correlations | 14(12.73%) |
|                | Average degree                  | 6.875      |
|                | Density                         | 0.222      |
|                | Modularity                      | 0.469      |
| Veraison-early | Number of nodes                 | 13         |
|                | Number of edges                 | 17         |
|                | Number of positive correlations | 11(64.71%) |
|                | Number of negative correlations | 6(35.29%)  |
|                | Average degree                  | 2.615      |
|                | Density                         | 0.218      |
|                | Modularity                      | 0.588      |
| Veraison-end   | Number of nodes                 | 12         |
|                | Number of edges                 | 14         |
|                | Number of positive correlations | 9(64.29%)  |
|                | Number of negative correlations | 5(35.71%)  |
|                | Average degree                  | 2.333      |
|                | Density                         | 0.212      |
|                | Modularity                      | 0.622      |
| Mid-maturity   | Number of nodes                 | 30         |
|                | Number of edges                 | 68         |
|                | Number of positive correlations | 52(76.47%) |
|                | Number of negative correlations | 16(23.53%) |
|                | Average degree                  | 4.533      |
|                | Density                         | 0.156      |
|                | Modularity                      | 0.778      |
| Harvest        | Number of nodes                 | 22         |
|                | Number of edges                 | 68         |
|                | Number of positive correlations | 32(47.06%) |
|                | Number of negative correlations | 36(52.94%) |
|                | Average degree                  | 6.182      |
|                | Density                         | 0.294      |
|                | Modularity                      | 0.548      |

**Table S3:** Overview of topological complementary parameters of bacterial networks during grape growing process

| Growing stage  | Network parameters              | Value        |
|----------------|---------------------------------|--------------|
| Fruit-set      | Number of nodes                 | 97           |
|                | Number of edges                 | 1181         |
|                | Number of positive correlations | 637(53.94%)  |
|                | Number of negative correlations | 544(46.06%)  |
|                | Average degree                  | 24.351       |
|                | Density                         | 0.254        |
|                | Modularity                      | 0.642        |
| Veraison-early | Number of nodes                 | 143          |
|                | Number of edges                 | 2226         |
|                | Number of positive correlations | 1191(53.50%) |
|                | Number of negative correlations | 1035(46.50%) |
|                | Average degree                  | 31.133       |
|                | Density                         | 0.219        |
|                | Modularity                      | 0.688        |
| Veraison-end   | Number of nodes                 | 147          |
|                | Number of edges                 | 2158         |
|                | Number of positive correlations | 1351(62.60%) |
|                | Number of negative correlations | 807(37.40%)  |
|                | Average degree                  | 29.361       |
|                | Density                         | 0.201        |
|                | Modularity                      | 0.745        |
| Mid-maturity   | Number of nodes                 | 96           |
|                | Number of edges                 | 1026         |
|                | Number of positive correlations | 526(51.27%)  |
|                | Number of negative correlations | 500(48.73%)  |
|                | Average degree                  | 21.375       |
|                | Density                         | 0.225        |
|                | Modularity                      | 0.666        |
| Harvest        | Number of nodes                 | 49           |
|                | Number of edges                 | 356          |
|                | Number of positive correlations | 178(50%)     |
|                | Number of negative correlations | 178(50%)     |
|                | Average degree                  | 14.531       |
|                | Density                         | 0.303        |
|                | Modularity                      | 0.635        |
